# Supplementary material for: ER-depletion lowering the 'hypothalamus-uterus-kidney' axis functions by perturbing the renal ERβ/Ptgds signalling pathway
Source: publisher site journal article supplement (doi:10.18632/aging.102401), 2019-11-10
Supplement: Supplementary file [file aging-v11i21-102401-supplementary-material-SD2.pdf]

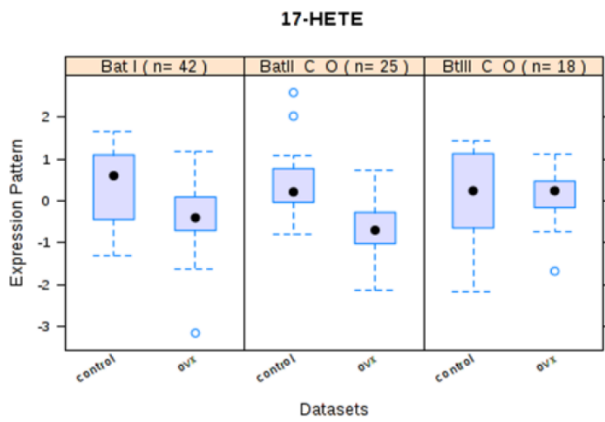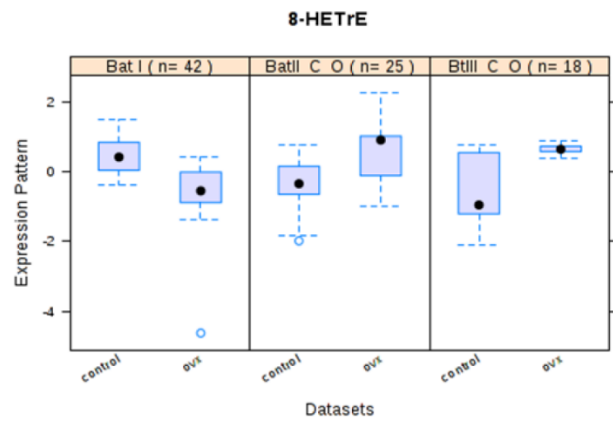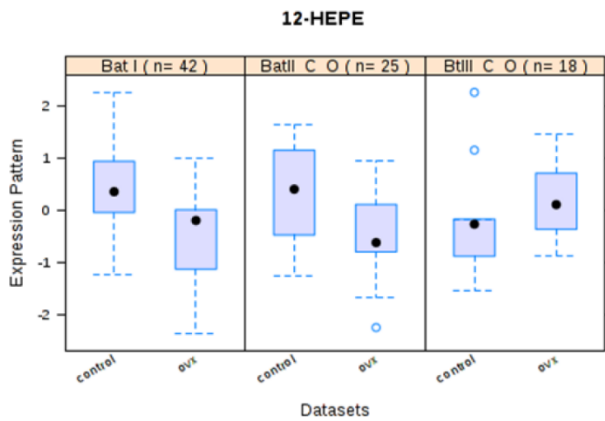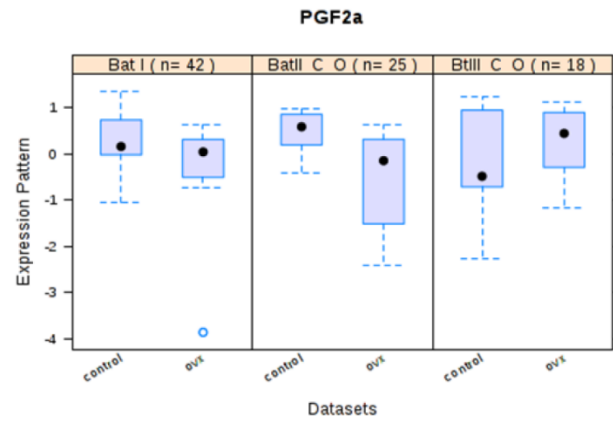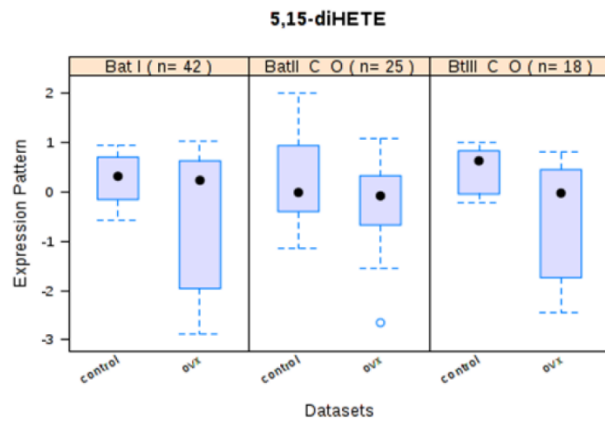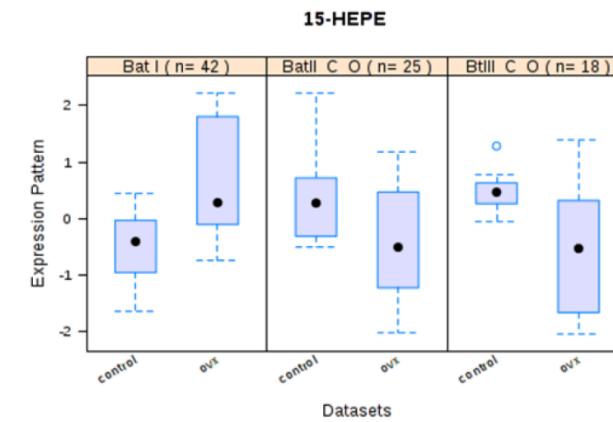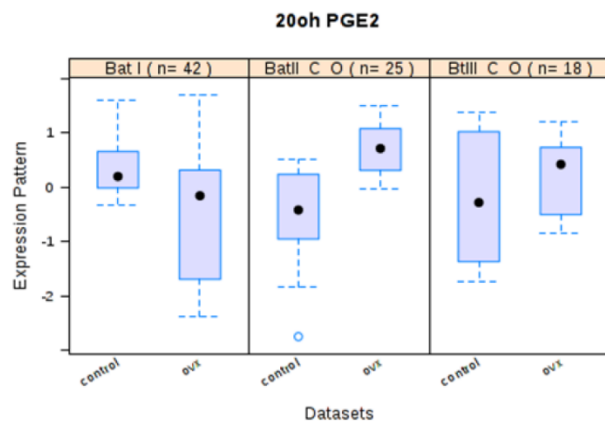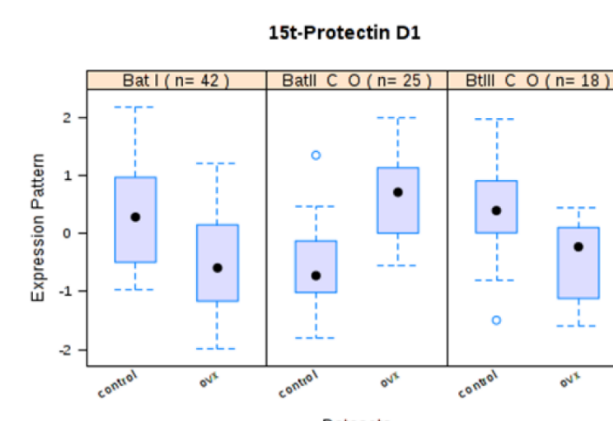

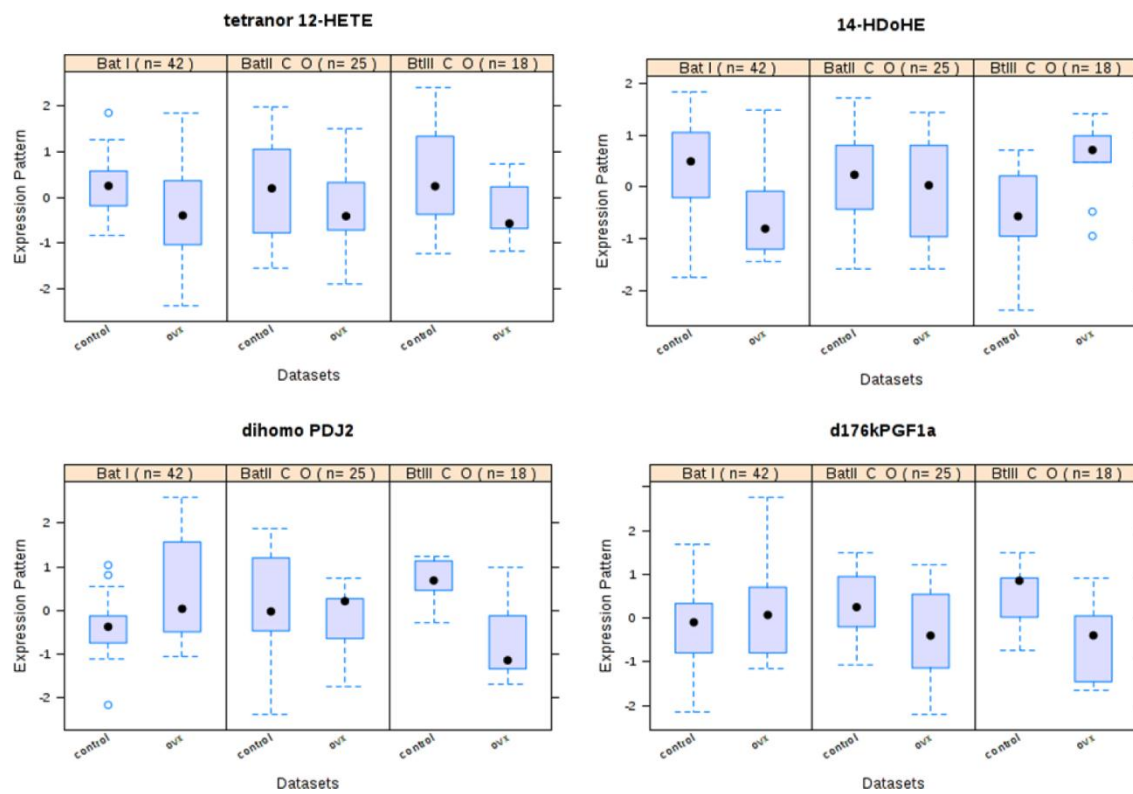

**Supplementary Figure 2. Box plot of the expression pattern of the selected feature between the two experimental groups across all studies.** The expression pattern is on the y-axis, and the group labels are on the x-axis. The median expression for the feature is indicated with a black dot in the center of the boxplot.
