# Supplementary material for: ER-depletion lowering the 'hypothalamus-uterus-kidney' axis functions by perturbing the renal ERβ/Ptgds signalling pathway
Source: Aging (Albany NY). 2019 Nov 10;11(21):9500–29. doi: 10.18632/aging.102401 (PMC6874469; doi:10.18632/aging.102401)
Supplement: Supplementary Table 13 [file aging-11-102401-s001.xlsx]

## Sheet: urine
	0_Ptgds	0_Erb	1_BW	1_Liver%	1_Kidney%	1_Uteru%	1_Ht%	2_ALB	2_UA	2_UREA	2_Glu	2_CREA	3_TC	3_TG	3_HDL	3_LDL	6kPGF1a	PGF2a	dihomo PDJ2	15k PGF2a	dhk PGD2	11bdhk PGF2a	20oh PGE2	PGFM	PGA2	PGB2	PGJ2	15d PGD2	Arachidonic	8-iso PGF3a
0_Ptgds	1	-1	0.977138	-0.72277	-0.783524	-0.999351	-0.997039	0.797972	-0.12595	0.18916	0.064372	0.0819999	-0.150946	0.80115	-0.960326	0.911323	-0.22155	0.889828	-0.654592	0.486376	-0.252452	0.857998	0.329817	-0.665311	-0.737584	-0.782485	-0.767741	-0.241265	0.1337	-0.199634
0_Erb	-1	1	-0.977138	0.72277	0.783524	0.999351	0.997039	-0.797972	0.12595	-0.18916	-0.064372	-0.0819999	0.150946	-0.80115	0.960326	-0.911323	0.22155	-0.889828	0.654592	-0.486376	0.252452	-0.857998	-0.329817	0.665311	0.737584	0.782485	0.767741	0.241265	-0.1337	0.199634
1_BW	0.977138	-0.977138	1	-0.83904	-0.896991	-0.984032	-0.989589	0.775621	-0.0300166	0.356846	0.245898	0.291872	-0.194739	0.747583	-0.956381	0.865362	-0.0450826	0.832786	-0.515794	0.435691	-0.0847708	0.814888	0.472949	-0.586048	-0.641144	-0.652899	-0.800067	-0.114756	0.204079	-0.343678
1_Liver%	-0.72277	0.72277	-0.83904	1	0.971511	0.746358	0.77356	-0.595515	0.0809746	-0.806639	-0.434783	-0.692221	0.532792	-0.423349	0.742789	-0.46822	-0.439496	-0.637899	0.135842	-0.281593	-0.410086	-0.446853	-0.851525	0.121048	0.253783	0.190371	0.578774	-0.388278	-0.378857	0.691134
1_Kidney%	-0.783524	0.783524	-0.896991	0.971511	1	0.805324	0.827531	-0.62007	-0.113888	-0.68435	-0.54949	-0.68209	0.318221	-0.513799	0.80386	-0.61537	-0.34572	-0.613087	0.158795	-0.276267	-0.298492	-0.581053	-0.733836	0.29738	0.33661	0.278104	0.719549	-0.208187	-0.332817	0.612593
1_Uteru%	-0.999351	0.999351	-0.984032	0.746358	0.805324	1	0.999122	-0.797454	0.116213	-0.221337	-0.0914943	-0.117454	0.165038	-0.793603	0.962609	-0.903959	0.190728	-0.885414	0.634132	-0.480498	0.222729	-0.851215	-0.35848	0.650403	0.722842	0.762331	0.772829	0.21636	-0.147319	0.226701
1_Ht%	-0.997039	0.997039	-0.989589	0.77356	0.827531	0.999122	1	-0.796981	0.117613	-0.261762	-0.112904	-0.154617	0.192101	-0.782133	0.963218	-0.889628	0.154085	-0.883938	0.612995	-0.475658	0.186251	-0.838127	-0.395289	0.626195	0.704299	0.738028	0.771394	0.180884	-0.1642	0.259386
2_ALB	0.797972	-0.797972	0.775621	-0.595515	-0.62007	-0.797454	-0.796981	1	-0.201763	0.193321	-0.0179007	0.0500283	-0.216568	0.77365	-0.757486	0.688383	-0.148792	0.738286	-0.575142	0.249982	-0.200763	0.568345	0.29042	-0.442147	-0.508605	-0.578946	-0.454576	-0.231125	0.372426	-0.184325
2_UA	-0.12595	0.12595	-0.0300166	0.0809746	-0.113888	0.116213	0.117613	-0.201763	1	-0.165119	0.818175	0.392822	0.779297	-0.0165422	0.0711772	0.184586	0.0915604	-0.496357	0.417191	-0.282043	0.0132632	0.15739	-0.244565	-0.300993	0.119646	0.186894	-0.375182	-0.344216	-0.0657745	0.0511097
2_UREA	0.18916	-0.18916	0.356846	-0.806639	-0.68435	-0.221337	-0.261762	0.193321	-0.165119	1	0.427558	0.841765	-0.744343	-0.0806889	-0.242258	-0.142677	0.791107	0.221644	0.297517	0.0285322	0.788295	-0.123261	0.956529	0.440826	0.248977	0.365541	-0.104264	0.80462	0.429823	-0.810725
2_Glu	0.064372	-0.064372	0.245898	-0.434783	-0.54949	-0.0914943	-0.112904	-0.0179007	0.818175	0.427558	1	0.843947	0.285428	-0.0021278	-0.141937	0.156087	0.515618	-0.26641	0.50447	-0.207902	0.439663	0.138118	0.340125	-0.0765634	0.196936	0.321511	-0.460765	0.120543	0.192402	-0.42623
2_CREA	0.0819999	-0.0819999	0.291872	-0.692221	-0.68209	-0.117454	-0.154617	0.0500283	0.392822	0.841765	0.843947	1	-0.269132	-0.105925	-0.162594	-0.0574829	0.796715	-0.0861861	0.523115	-0.139701	0.752301	-0.0526741	0.754072	0.266849	0.31796	0.464927	-0.281348	0.57278	0.363242	-0.726237
3_TC	-0.150946	0.150946	-0.194739	0.532792	0.318221	0.165038	0.192101	-0.216568	0.779297	-0.744343	0.285428	-0.269132	1	0.0857083	0.150044	0.268571	-0.458606	-0.430003	0.055745	-0.182819	-0.511802	0.23459	-0.762531	-0.525518	-0.120144	-0.151837	-0.231443	-0.764846	-0.31345	0.544555
3_TG	0.80115	-0.80115	0.747583	-0.423349	-0.513799	-0.793603	-0.782133	0.77365	-0.0165422	-0.0806889	-0.0021278	-0.105925	0.0857083	1	-0.736342	0.819218	-0.363821	0.735847	-0.514393	0.396781	-0.378335	0.68527	0.00903804	-0.713075	-0.570586	-0.658276	-0.482592	-0.436817	0.107947	0.140899
3_HDL	-0.960326	0.960326	-0.956381	0.742789	0.80386	0.962609	0.963218	-0.757486	0.0711772	-0.242258	-0.141937	-0.162594	0.150044	-0.736342	1	-0.87078	0.131209	-0.852274	0.546603	-0.488288	0.151679	-0.822426	-0.398998	0.635459	0.600941	0.683722	0.844707	0.219033	-0.109743	0.172644
3_LDL	0.911323	-0.911323	0.865362	-0.46822	-0.61537	-0.903959	-0.889628	0.688383	0.184586	-0.142677	0.156087	-0.0574829	0.268571	0.819218	-0.87078	1	-0.425286	0.694556	-0.630019	0.403517	-0.475921	0.933988	-0.0105171	-0.870779	-0.77713	-0.837909	-0.835481	-0.5634	-0.00762016	0.0476946
6kPGF1a	-0.22155	0.22155	-0.0450826	-0.439496	-0.34572	0.190728	0.154085	-0.148792	0.0915604	0.791107	0.515618	0.796715	-0.458606	-0.363821	0.131209	-0.425286	1	-0.25902	0.571037	-0.230416	0.747653	-0.504175	0.643057	0.686801	0.64799	0.721534	0.108607	0.720192	0.173517	-0.643278
PGF2a	0.889828	-0.889828	0.832786	-0.637899	-0.613087	-0.885414	-0.883938	0.738286	-0.496357	0.221644	-0.26641	-0.0861861	-0.430003	0.735847	-0.852274	0.694556	-0.25902	1	-0.656701	0.542071	-0.241578	0.66498	0.391754	-0.506232	-0.620209	-0.736104	-0.51425	-0.112575	0.247765	-0.131121
dihomo PDJ2	-0.654592	0.654592	-0.515794	0.135842	0.158795	0.634132	0.612995	-0.575142	0.417191	0.297517	0.50447	0.523115	0.055745	-0.514393	0.546603	-0.630019	0.571037	-0.656701	1	-0.412454	0.593277	-0.652484	0.210154	0.567307	0.727811	0.839204	0.305557	0.44797	0.199846	-0.140708
15k PGF2a	0.486376	-0.486376	0.435691	-0.281593	-0.276267	-0.480498	-0.475658	0.249982	-0.282043	0.0285322	-0.207902	-0.139701	-0.182819	0.396781	-0.488288	0.403517	-0.230416	0.542071	-0.412454	1	-0.169201	0.349356	0.160297	-0.368403	-0.518097	-0.465639	-0.290715	-0.0297896	-0.0342921	-0.235911
dhk PGD2	-0.252452	0.252452	-0.0847708	-0.410086	-0.298492	0.222729	0.186251	-0.200763	0.0132632	0.788295	0.439663	0.752301	-0.511802	-0.378335	0.151679	-0.475921	0.747653	-0.241578	0.593277	-0.169201	1	-0.375803	0.708215	0.617336	0.535979	0.724477	0.192808	0.870435	0.0801884	-0.518285
11bdhk PGF2a	0.857998	-0.857998	0.814888	-0.446853	-0.581053	-0.851215	-0.838127	0.568345	0.15739	-0.123261	0.138118	-0.0526741	0.23459	0.68527	-0.822426	0.933988	-0.504175	0.66498	-0.652484	0.349356	-0.375803	1	0.0147255	-0.884438	-0.794106	-0.832655	-0.820335	-0.492965	-0.0679614	0.0755367
20oh PGE2	0.329817	-0.329817	0.472949	-0.851525	-0.733836	-0.35848	-0.395289	0.29042	-0.244565	0.956529	0.340125	0.754072	-0.762531	0.00903804	-0.398998	-0.0105171	0.643057	0.391754	0.210154	0.160297	0.708215	0.0147255	1	0.307089	0.10311	0.197231	-0.238389	0.729246	0.490612	-0.770702
PGFM	-0.665311	0.665311	-0.586048	0.121048	0.29738	0.650403	0.626195	-0.442147	-0.300993	0.440826	-0.0765634	0.266849	-0.525518	-0.713075	0.635459	-0.870779	0.686801	-0.506232	0.567307	-0.368403	0.617336	-0.884438	0.307089	1	0.691807	0.806092	0.697541	0.776718	0.0479389	-0.329554
PGA2	-0.737584	0.737584	-0.641144	0.253783	0.33661	0.722842	0.704299	-0.508605	0.119646	0.248977	0.196936	0.31796	-0.120144	-0.570586	0.600941	-0.77713	0.64799	-0.620209	0.727811	-0.518097	0.535979	-0.794106	0.10311	0.691807	1	0.912069	0.510912	0.397327	0.00891956	0.0210679
PGB2	-0.782485	0.782485	-0.652899	0.190371	0.278104	0.762331	0.738028	-0.578946	0.186894	0.365541	0.321511	0.464927	-0.151837	-0.658276	0.683722	-0.837909	0.721534	-0.736104	0.839204	-0.465639	0.724477	-0.832655	0.197231	0.806092	0.912069	1	0.574513	0.611812	-0.00851952	-0.18297
PGJ2	-0.767741	0.767741	-0.800067	0.578774	0.719549	0.772829	0.771394	-0.454576	-0.375182	-0.104264	-0.460765	-0.281348	-0.231443	-0.482592	0.844707	-0.835481	0.108607	-0.51425	0.305557	-0.290715	0.192808	-0.820335	-0.238389	0.697541	0.510912	0.574513	1	0.37371	-0.0610937	0.134727
15d PGD2	-0.241265	0.241265	-0.114756	-0.388278	-0.208187	0.21636	0.180884	-0.231125	-0.344216	0.80462	0.120543	0.57278	-0.764846	-0.436817	0.219033	-0.5634	0.720192	-0.112575	0.44797	-0.0297896	0.870435	-0.492965	0.729246	0.776718	0.397327	0.611812	0.37371	1	0.128916	-0.632657
Arachidonic	0.1337	-0.1337	0.204079	-0.378857	-0.332817	-0.147319	-0.1642	0.372426	-0.0657745	0.429823	0.192402	0.363242	-0.31345	0.107947	-0.109743	-0.00762016	0.173517	0.247765	0.199846	-0.0342921	0.0801884	-0.0679614	0.490612	0.0479389	0.00891956	-0.00851952	-0.0610937	0.128916	1	-0.493647
8-iso PGF3a	-0.199634	0.199634	-0.343678	0.691134	0.612593	0.226701	0.259386	-0.184325	0.0511097	-0.810725	-0.42623	-0.726237	0.544555	0.140899	0.172644	0.0476946	-0.643278	-0.131121	-0.140708	-0.235911	-0.518285	0.0755367	-0.770702	-0.329554	0.0210679	-0.18297	0.134727	-0.632657	-0.493647	1

## Sheet: Sheet2
	0_PTGDS	0_Erb	1_BW	1_Liver%	1_Kidney%	1_Uteru%	1_Ht%	2_ALB	2_UA	2_UREA	2_Glu	2_CREA	3_TC	3_TG	3_HDL	3_LDL	15k PGD2	dhk PGF2a	PGB2	PGJ2	15d PGJ2	Arachidonic	EPA	DHA	8-iso PGF3a
0_PTGDS	1	-1	0.982706	-0.770213	-0.824316	-0.999513	-0.997777	0.836874	-0.145051	0.217132	0.0742789	0.0945794	-0.17364	0.839621	-0.9698	0.931266	-0.308762	-0.47322	-0.602464	-0.276508	-0.50321	-0.354305	-0.469316	-0.563559	-0.600954
0_Erb	-1	1	-0.982706	0.770213	0.824316	0.999513	0.997777	-0.836874	0.145051	-0.217132	-0.0742789	-0.0945794	0.17364	-0.839621	0.9698	-0.931266	0.308762	0.47322	0.602464	0.276508	0.50321	0.354305	0.469316	0.563559	0.600954
1_BW	0.982706	-0.982706	1	-0.863631	-0.914316	-0.987907	-0.992104	0.819152	-0.0617102	0.362306	0.232268	0.27716	-0.211629	0.797235	-0.966748	0.895795	-0.317125	-0.49061	-0.563364	-0.237892	-0.510268	-0.311693	-0.432348	-0.638363	-0.528905
1_Liver%	-0.770213	0.770213	-0.863631	1	0.97561	0.789069	0.810835	-0.6603	0.102463	-0.781834	-0.415274	-0.656328	0.523277	-0.516273	0.786255	-0.561723	0.301942	0.484165	0.359199	0.0120171	0.465479	0.134255	0.210959	0.829764	0.174337
1_Kidney%	-0.824316	0.824316	-0.914316	0.97561	1	0.84152	0.859064	-0.685579	-0.0735997	-0.664581	-0.515609	-0.640256	0.324624	-0.597908	0.840396	-0.688097	0.300841	0.476538	0.406041	0.104301	0.468984	0.175687	0.285965	0.750388	0.286944
1_Uteru%	-0.999513	0.999513	-0.987907	0.789069	0.84152	1	0.99934	-0.836467	0.136639	-0.244838	-0.0977552	-0.125254	0.185799	-0.833688	0.97153	-0.925622	0.311329	0.47806	0.597097	0.268778	0.506176	0.347568	0.463045	0.580048	0.588438
1_Ht%	-0.997777	0.997777	-0.992104	0.810835	0.859064	0.99934	1	-0.836094	0.137845	-0.279682	-0.116311	-0.157444	0.209172	-0.824661	0.971991	-0.914626	0.314514	0.484184	0.590126	0.256406	0.509845	0.339081	0.453411	0.602033	0.570651
2_ALB	0.836874	-0.836874	0.819152	-0.6603	-0.685579	-0.836467	-0.836094	1	-0.213115	0.219974	-0.00070661	0.0651749	-0.232283	0.81341	-0.80459	0.748145	-0.308164	-0.353249	-0.391858	-0.199728	-0.352659	-0.473601	-0.314703	-0.521811	-0.571597
2_UA	-0.145051	0.145051	-0.0617102	0.102463	-0.0735997	0.136639	0.137845	-0.213115	1	-0.171585	0.812764	0.387919	0.780607	-0.0454214	0.0972532	0.129154	0.0823384	0.138725	0.104433	-0.191218	0.129647	0.0558774	-0.0613693	0.313466	-0.0817118
2_UREA	0.217132	-0.217132	0.362306	-0.781834	-0.664581	-0.244838	-0.279682	0.219974	-0.171585	1	0.42877	0.840988	-0.746575	-0.027224	-0.263263	-0.0749679	-0.170077	-0.295045	0.0252613	0.280719	-0.23616	0.132325	0.146427	-0.758135	0.333069
2_Glu	0.0742789	-0.0742789	0.232268	-0.415274	-0.515609	-0.0977552	-0.116311	-0.00070661	0.812764	0.42877	1	0.844178	0.28093	0.0136615	-0.142057	0.155331	-0.0468843	-0.0798478	0.0597357	-0.0401747	-0.0572732	0.0968249	-0.0130617	-0.189633	0.0631746
2_CREA	0.0945794	-0.0945794	0.27716	-0.656328	-0.640256	-0.125254	-0.157444	0.0651749	0.387919	0.840988	0.844178	1	-0.271922	-0.0761785	-0.164971	-0.0287946	-0.105711	-0.187545	0.0992009	0.168496	-0.13615	0.165879	0.118792	-0.525388	0.287413
3_TC	-0.17364	0.17364	-0.211629	0.523277	0.324624	0.185799	0.209172	-0.232283	0.780607	-0.746575	0.28093	-0.271922	1	0.041048	0.172827	0.196355	0.145489	0.253638	0.015673	-0.328636	0.207602	-0.0702014	-0.166401	0.664773	-0.308955
3_TG	0.839621	-0.839621	0.797235	-0.516273	-0.597908	-0.833688	-0.824661	0.81341	-0.0454214	-0.027224	0.0136615	-0.0761785	0.041048	1	-0.788052	0.853487	-0.44153	-0.250424	-0.399343	-0.357388	-0.449365	-0.219775	-0.380205	-0.334414	-0.647841
3_HDL	-0.9698	0.9698	-0.966748	0.786255	0.840396	0.97153	0.971991	-0.80459	0.0972532	-0.263263	-0.142057	-0.164971	0.172827	-0.788052	1	-0.899747	0.272419	0.484131	0.6058	0.275334	0.512512	0.325177	0.419118	0.58694	0.576779
3_LDL	0.931266	-0.931266	0.895795	-0.561723	-0.688097	-0.925622	-0.914626	0.748145	0.129154	-0.0749679	0.155331	-0.0287946	0.196355	0.853487	-0.899747	1	-0.252343	-0.375007	-0.59713	-0.398887	-0.422849	-0.382603	-0.530967	-0.307646	-0.717981
15k PGD2	-0.308762	0.308762	-0.317125	0.301942	0.300841	0.311329	0.314514	-0.308164	0.0823384	-0.170077	-0.0468843	-0.105711	0.145489	-0.44153	0.272419	-0.252343	1	-0.09622	0.313541	0.0281198	0.352522	-0.196922	0.583463	0.311665	0.0253249
dhk PGF2a	-0.47322	0.47322	-0.49061	0.484165	0.476538	0.47806	0.484184	-0.353249	0.138725	-0.295045	-0.0798478	-0.187545	0.253638	-0.250424	0.484131	-0.375007	-0.09622	1	0.348295	-0.192879	0.636111	0.148768	-0.00359141	0.394778	0.287917
PGB2	-0.602464	0.602464	-0.563364	0.359199	0.406041	0.597097	0.590126	-0.391858	0.104433	0.0252613	0.0597357	0.0992009	0.015673	-0.399343	0.6058	-0.59713	0.313541	0.348295	1	0.467405	0.321234	0.427797	0.494473	0.252108	0.47771
PGJ2	-0.276508	0.276508	-0.237892	0.0120171	0.104301	0.268778	0.256406	-0.199728	-0.191218	0.280719	-0.0401747	0.168496	-0.328636	-0.357388	0.275334	-0.398887	0.0281198	-0.192879	0.467405	1	-0.0083335	0.382481	0.112923	-0.173217	0.613549
15d PGJ2	-0.50321	0.50321	-0.510268	0.465479	0.468984	0.506176	0.509845	-0.352659	0.129647	-0.23616	-0.0572732	-0.13615	0.207602	-0.449365	0.512512	-0.422849	0.352522	0.636111	0.321234	-0.0083335	1	-0.135592	0.156492	0.546114	0.253667
Arachidonic	-0.354305	0.354305	-0.311693	0.134255	0.175687	0.347568	0.339081	-0.473601	0.0558774	0.132325	0.0968249	0.165879	-0.0702014	-0.219775	0.325177	-0.382603	-0.196922	0.148768	0.427797	0.382481	-0.135592	1	0.0223201	-0.0062355	0.395873
EPA	-0.469316	0.469316	-0.432348	0.210959	0.285965	0.463045	0.453411	-0.314703	-0.0613693	0.146427	-0.0130617	0.118792	-0.166401	-0.380205	0.419118	-0.530967	0.583463	-0.00359141	0.494473	0.112923	0.156492	0.0223201	1	0.194699	0.323736
DHA	-0.563559	0.563559	-0.638363	0.829764	0.750388	0.580048	0.602033	-0.521811	0.313466	-0.758135	-0.189633	-0.525388	0.664773	-0.334414	0.58694	-0.307646	0.311665	0.394778	0.252108	-0.173217	0.546114	-0.0062355	0.194699	1	-0.0278668
8-iso PGF3a	-0.600954	0.600954	-0.528905	0.174337	0.286944	0.588438	0.570651	-0.571597	-0.0817118	0.333069	0.0631746	0.287413	-0.308955	-0.647841	0.576779	-0.717981	0.0253249	0.287917	0.47771	0.613549	0.253667	0.395873	0.323736	-0.0278668	1
	0_Ptgds	0_Erb	1_BW	1_Liver%	1_Kidney%	1_Uteru%	1_Ht%	2_ALB	3_TG	3_HDL	3_LDL
0_Ptgds	1	-1	0.977138	-0.72277	-0.783524	-0.999351	-0.997039	0.797972	0.80115	-0.960326	0.911323
0_Erb	-1	1	-0.977138	0.72277	0.783524	0.999351	0.997039	-0.797972	-0.80115	0.960326	-0.911323
	0_PTGDS	0_Erb	1_BW	1_Liver%	1_Kidney%	1_Uteru%	1_Ht%	2_ALB	3_TG	3_HDL	3_LDL
0_PTGDS	1	-1	0.982706	-0.770213	-0.824316	-0.999513	-0.997777	0.836874	0.839621	-0.9698	0.931266
0_Erb	-1	1	-0.982706	0.770213	0.824316	0.999513	0.997777	-0.836874	-0.839621	0.9698	-0.931266
	0_Ptgds	0_Erb	1_BW	1_Liver%	1_Kidney%	1_Uteru%	1_Ht%	2_ALB	3_TG	3_HDL	3_LDL
0_PTGDS	1	-1	0.979922	-0.746492	-0.80392	-0.999432	-0.997408	0.817423	0.820385	-0.965063	0.921295
0_Erb	-1	1	-0.979922	0.746492	0.80392	0.999432	0.997408	-0.817423	-0.820385	0.965063	-0.921295
